# Supplementary material
Source: MDPI journal article supplement (https://www.mdpi.com/2227-9717/9/7/1181)
Supplement: s1 [file s1]

Article – Supplementary materials

# Long-Term Effects of Calcium-Based Liming Materials on Soil Fertility Sustainability and Rye Production as Soil Quality Indicators on a Typic Paleixerult

Miguel Ángel Olego <sup>1,\*</sup>, Miguel Javier Quiroga <sup>1</sup>, Cristina Mendaña-Cuervo <sup>1</sup>, Jorge Cara-Jiménez <sup>2</sup>, Roberto López <sup>3</sup> and Enrique Garzón-Jimeno <sup>1</sup>

<sup>1</sup> Research Institute of Vine and Wine, Universidad de León, Avenida de Portugal, CP 24071 León, Spain; germqm@unileon.es (M.J.Q.); cristina.mendana@unileon.es (C.M.-C.); jgarj@unileon.es (E.G.-J.)

<sup>2</sup> Chemical and Environmental Bioprocess Engineering Group, Natural Resources Institute, Universidad de León, Avenida de Portugal, CP 24071 León, Spain; jorge.cara@unileon.es

<sup>3</sup> Physical Chemistry Area, Department of Chemistry and Physics, Faculty of Biology and Environmental Sciences, Campus de Vegazana, Universidad de León, CP 24071 León, Spain; rlopg@unileon.es

\* Correspondence: molem@unileon.es

**Table S1.** Means and standard deviations (SD) of soil properties pH, SOM (soil organic matter in %), Ca, Mg, K and Al (in cmol (+)/kg) during ten years (2002–2011). Values within each column followed by different lowercase letters are significantly different according to Tukey’s honest significance test with Holm-Bonferroni adjustment (0.05). Y: Year of sampling; D: Depth of sampling (Ap1 horizon: 0–12 cm, Ap2 horizon: 12–25 cm and AB horizon: 25–35 cm); T: Liming treatment (C: control; G: gypsum; L: limestone; SF: sugar foam).

| Y    | D   | T  | pH      |      | SOM     |      | Ca      |      | Mg      |      | K       |      | Al      |      |
|------|-----|----|---------|------|---------|------|---------|------|---------|------|---------|------|---------|------|
|      |     |    | Mean    | SD   |
| 2002 | Ap1 | C  | 3.97 a  | 0.01 | 2.27 a  | 0.53 | 0.10 a  | 0.01 | 0.04 a  | 0.02 | 0.09 b  | 0.03 | 1.30 c  | 0.26 |
| 2002 | Ap1 | G  | 4.21 ab | 0.05 | 2.37 a  | 0.44 | 4.01 b  | 2.58 | 0.09 ab | 0.04 | 0.07 ab | 0.02 | 0.59 b  | 0.28 |
| 2002 | Ap1 | L  | 5.70 c  | 0.86 | 2.26 a  | 0.48 | 4.74 b  | 2.88 | 0.10 b  | 0.01 | 0.07 ab | 0.01 | 0.05 a  | 0.03 |
| 2002 | Ap1 | SF | 4.98 bc | 0.51 | 2.16 a  | 0.23 | 2.03 ab | 0.97 | 0.09 ab | 0.05 | 0.06 a  | 0.01 | 0.17 a  | 0.11 |
| 2002 | Ap2 | C  | 4.01 a  | 0.02 | 2.06 a  | 0.54 | 0.14 a  | 0.07 | 0.04 a  | 0.03 | 0.07 ab | 0.01 | 1.29 b  | 0.22 |
| 2002 | Ap2 | G  | 4.07 ab | 0.09 | 1.97 a  | 0.51 | 1.01 b  | 0.12 | 0.06 a  | 0.01 | 0.06 a  | 0.01 | 1.12 ab | 0.39 |
| 2002 | Ap2 | L  | 4.16 bc | 0.06 | 2.44 a  | 0.53 | 1.04 b  | 0.14 | 0.10 b  | 0.02 | 0.10 b  | 0.04 | 0.71 a  | 0.06 |
| 2002 | Ap2 | SF | 4.23 c  | 0.09 | 2.20 a  | 0.18 | 0.67 b  | 0.56 | 0.05 a  | 0.03 | 0.05 a  | 0.01 | 0.69 a  | 0.36 |
| 2002 | AB  | C  | 4.13 a  | 0.04 | 1.03 a  | 0.54 | 0.36 a  | 0.05 | 0.05 ab | 0.01 | 0.04 ab | 0.00 | 1.33 a  | 0.23 |
| 2002 | AB  | G  | 4.13 a  | 0.16 | 0.86 a  | 0.29 | 0.95 c  | 0.11 | 0.07 b  | 0.05 | 0.04 a  | 0.01 | 1.26 a  | 0.50 |
| 2002 | AB  | L  | 4.21 a  | 0.15 | 0.90 a  | 0.45 | 0.64 b  | 0.29 | 0.04 ab | 0.01 | 0.05 c  | 0.01 | 1.08 a  | 0.27 |
| 2002 | AB  | SF | 4.20 a  | 0.23 | 1.04 a  | 0.13 | 0.28 a  | 0.13 | 0.03 a  | 0.01 | 0.05 bc | 0.01 | 1.13 a  | 0.51 |
| 2003 | Ap1 | C  | 3.79 a  | 0.07 | 1.92 ab | 0.32 | 0.20 a  | 0.12 | 0.04 a  | 0.03 | 0.06 a  | 0.02 | 1.24 c  | 0.05 |
| 2003 | Ap1 | G  | 3.97 a  | 0.03 | 1.87 ab | 0.20 | 1.42 a  | 0.23 | 0.03 a  | 0.01 | 0.06 a  | 0.01 | 0.73 b  | 0.08 |
| 2003 | Ap1 | L  | 5.31 b  | 0.15 | 2.13 b  | 0.26 | 4.04 b  | 0.49 | 0.06 a  | 0.02 | 0.08 a  | 0.05 | 0.07 a  | 0.06 |
| 2003 | Ap1 | SF | 6.37 c  | 1.00 | 1.70 a  | 0.23 | 4.82 b  | 2.24 | 0.24 a  | 0.32 | 0.06 a  | 0.00 | 0.05 a  | 0.01 |
| 2003 | Ap2 | C  | 3.79 a  | 0.04 | 1.98 b  | 0.28 | 0.24 a  | 0.10 | 0.05 a  | 0.00 | 0.07 a  | 0.02 | 1.20 b  | 0.07 |
| 2003 | Ap2 | G  | 3.89 ab | 0.06 | 1.87 b  | 0.19 | 1.12 ab | 0.32 | 0.03 a  | 0.03 | 0.05 a  | 0.01 | 0.97 b  | 0.11 |
| 2003 | Ap2 | L  | 4.09 b  | 0.17 | 1.92 b  | 0.18 | 1.48 b  | 1.19 | 0.04 a  | 0.02 | 0.06 a  | 0.02 | 0.84 b  | 0.68 |
| 2003 | Ap2 | SF | 4.63 c  | 0.18 | 1.38 a  | 0.26 | 1.81 b  | 0.16 | 0.18 a  | 0.25 | 0.05 a  | 0.01 | 0.29 a  | 0.08 |

| Y    | D   | T  | pH      |      | SOM     |      | Ca      |      | Mg      |      | K       |      | Al      |      |
|------|-----|----|---------|------|---------|------|---------|------|---------|------|---------|------|---------|------|
|      |     |    | Mean    | SD   |
| 2003 | AB  | C  | 3.91 a  | 0.03 | 0.90 a  | 0.43 | 0.11 a  | 0.13 | 0.05 a  | 0.03 | 0.06 a  | 0.02 | 1.25 a  | 0.17 |
| 2003 | AB  | G  | 3.95 ab | 0.11 | 1.00 a  | 0.21 | 0.61 b  | 0.17 | 0.03 a  | 0.03 | 0.05 a  | 0.01 | 1.17 a  | 0.26 |
| 2003 | AB  | L  | 4.04 b  | 0.08 | 0.80 a  | 0.05 | 0.85 bc | 0.15 | 0.06 a  | 0.04 | 0.06 a  | 0.01 | 1.06 a  | 0.48 |
| 2003 | AB  | SF | 4.24 c  | 0.10 | 0.94 a  | 0.28 | 0.91 c  | 0.22 | 0.11 a  | 0.11 | 0.05 a  | 0.01 | 0.75 a  | 0.50 |
| 2004 | Ap1 | C  | 3.84 a  | 0.05 | 2.40 a  | 0.33 | 0.59 a  | 0.30 | 0.02 a  | 0.01 | 0.08 a  | 0.04 | 3.01 c  | 0.45 |
| 2004 | Ap1 | G  | 4.37 a  | 0.36 | 2.41 a  | 0.20 | 1.46 a  | 1.06 | 0.08 b  | 0.02 | 0.06 a  | 0.06 | 1.30 b  | 0.49 |
| 2004 | Ap1 | L  | 5.32 b  | 0.65 | 2.01 a  | 0.15 | 3.70 b  | 0.28 | 0.09 b  | 0.05 | 0.05 a  | 0.01 | 0.47 a  | 0.11 |
| 2004 | Ap1 | SF | 5.70 b  | 0.90 | 2.42 a  | 0.38 | 3.59 b  | 0.31 | 0.02 a  | 0.02 | 0.05 a  | 0.02 | 1.63 b  | 0.67 |
| 2004 | Ap2 | C  | 4.01 a  | 0.25 | 2.20 a  | 0.94 | 0.30 a  | 0.20 | 0.02 a  | 0.01 | 0.08 a  | 0.04 | 1.77 b  | 0.18 |
| 2004 | Ap2 | G  | 4.02 a  | 0.14 | 2.27 a  | 0.21 | 1.12 b  | 0.48 | 0.03 a  | 0.02 | 0.06 a  | 0.03 | 1.90 b  | 0.48 |
| 2004 | Ap2 | L  | 4.36 ab | 0.24 | 2.34 a  | 0.11 | 1.65 b  | 0.20 | 0.06 a  | 0.03 | 0.06 a  | 0.01 | 0.84 a  | 0.66 |
| 2004 | Ap2 | SF | 4.52 b  | 0.30 | 2.05 a  | 0.15 | 1.36 b  | 0.55 | 0.06 a  | 0.06 | 0.05 a  | 0.05 | 1.70 b  | 0.67 |
| 2004 | AB  | C  | 4.00 a  | 0.08 | 0.67 a  | 0.11 | 0.53 a  | 0.43 | 0.05 a  | 0.04 | 0.04 a  | 0.01 | 2.17 a  | 1.20 |
| 2004 | AB  | G  | 4.08 a  | 0.12 | 0.71 a  | 0.26 | 1.12 b  | 0.17 | 0.04 a  | 0.04 | 0.05 a  | 0.01 | 2.17 a  | 1.19 |
| 2004 | AB  | L  | 4.11 a  | 0.06 | 0.79 a  | 0.18 | 0.98 b  | 0.13 | 0.08 a  | 0.06 | 0.04 a  | 0.01 | 1.96 a  | 0.65 |
| 2004 | AB  | SF | 4.38 b  | 0.23 | 0.72 a  | 0.09 | 0.86 ab | 0.24 | 0.02 a  | 0.02 | 0.03 a  | 0.02 | 2.36 a  | 1.49 |
| 2005 | Ap1 | C  | 3.74 a  | 0.06 | 2.33 a  | 0.08 | 0.07 a  | 0.04 | 0.02 a  | 0.01 | 0.14 b  | 0.05 | 1.59 c  | 0.37 |
| 2005 | Ap1 | G  | 3.98 a  | 0.19 | 2.48 a  | 0.26 | 1.25 a  | 0.12 | 0.06 b  | 0.02 | 0.12 b  | 0.01 | 1.12 b  | 0.32 |
| 2005 | Ap1 | L  | 5.26 b  | 0.24 | 2.51 a  | 0.41 | 5.25 b  | 1.51 | 0.11 c  | 0.01 | 0.11 ab | 0.02 | 0.54 a  | 0.23 |
| 2005 | Ap1 | SF | 6.50 c  | 0.68 | 2.21 a  | 0.13 | 5.25 b  | 2.27 | 0.04 ab | 0.02 | 0.07 a  | 0.01 | 0.54 a  | 0.27 |
| 2005 | Ap2 | C  | 3.76 a  | 0.04 | 2.30 b  | 0.23 | 0.21 a  | 0.13 | 0.03 b  | 0.01 | 0.10 b  | 0.04 | 2.13 b  | 0.43 |
| 2005 | Ap2 | G  | 3.83 ab | 0.05 | 2.28 b  | 0.19 | 0.66 a  | 0.20 | 0.02 a  | 0.01 | 0.07 ab | 0.03 | 1.53 a  | 0.22 |
| 2005 | Ap2 | L  | 4.05 bc | 0.14 | 2.03 ab | 0.13 | 0.91 a  | 0.11 | 0.02 a  | 0.01 | 0.04 a  | 0.02 | 1.67 ab | 0.41 |
| 2005 | Ap2 | SF | 4.18 c  | 0.30 | 1.89 a  | 0.28 | 2.31 b  | 1.72 | 0.01 a  | 0.01 | 0.04 a  | 0.01 | 1.63 ab | 0.12 |
| 2005 | AB  | C  | 3.84 a  | 0.03 | 0.65 a  | 0.22 | 0.16 a  | 0.06 | 0.01 a  | 0.01 | 0.03 a  | 0.03 | 2.04 a  | 0.53 |
| 2005 | AB  | G  | 3.91 a  | 0.18 | 0.91 a  | 0.14 | 0.57 ab | 0.42 | 0.01 a  | 0.01 | 0.03 a  | 0.02 | 2.54 a  | 0.27 |
| 2005 | AB  | L  | 3.88 a  | 0.04 | 0.81 a  | 0.15 | 0.61 b  | 0.29 | 0.04 a  | 0.04 | 0.03 a  | 0.02 | 2.31 a  | 0.29 |
| 2005 | AB  | SF | 4.04 a  | 0.18 | 0.85 a  | 0.25 | 0.58 ab | 0.17 | 0.03 a  | 0.02 | 0.04 a  | 0.04 | 2.02 a  | 1.25 |
| 2006 | Ap1 | C  | 3.93 a  | 0.09 | 2.54 a  | 0.44 | 0.24 a  | 0.15 | 0.02 a  | 0.02 | 0.11 ab | 0.04 | 2.04 b  | 0.92 |
| 2006 | Ap1 | G  | 4.34 a  | 0.10 | 2.49 a  | 0.27 | 1.15 a  | 0.05 | 0.04 a  | 0.02 | 0.12 b  | 0.06 | 1.27 b  | 0.30 |
| 2006 | Ap1 | L  | 5.49 b  | 0.35 | 2.15 a  | 0.47 | 4.72 b  | 1.37 | 0.05 a  | 0.02 | 0.07 ab | 0.02 | 0.35 a  | 0.25 |
| 2006 | Ap1 | SF | 6.48 c  | 0.80 | 2.28 a  | 0.18 | 6.22 b  | 1.80 | 0.04 a  | 0.01 | 0.06 a  | 0.03 | 0.42 a  | 0.07 |
| 2006 | Ap2 | C  | 4.07 a  | 0.14 | 1.72 a  | 0.38 | 0.08 a  | 0.03 | 0.02 a  | 0.00 | 0.08 b  | 0.04 | 1.37 b  | 0.24 |
| 2006 | Ap2 | G  | 4.07 a  | 0.12 | 2.09 a  | 0.89 | 0.59 b  | 0.17 | 0.01 a  | 0.00 | 0.05 ab | 0.05 | 1.67 b  | 0.67 |
| 2006 | Ap2 | L  | 4.15 a  | 0.06 | 2.23 a  | 0.26 | 1.26 c  | 0.03 | 0.01 a  | 0.01 | 0.01 a  | 0.01 | 1.59 b  | 0.89 |
| 2006 | Ap2 | SF | 4.34 b  | 0.02 | 1.90 a  | 0.14 | 1.31 c  | 0.14 | 0.01 a  | 0.01 | 0.02 a  | 0.01 | 0.43 a  | 0.18 |
| 2006 | AB  | C  | 3.92 a  | 0.06 | 0.48 a  | 0.04 | 0.41 a  | 0.30 | 0.04 a  | 0.03 | 0.02 a  | 0.02 | 1.51 a  | 0.43 |
| 2006 | AB  | G  | 4.00 ab | 0.13 | 0.68 ab | 0.25 | 0.65 a  | 0.36 | 0.02 a  | 0.02 | 0.02 a  | 0.01 | 2.00 a  | 1.14 |
| 2006 | AB  | L  | 4.00 ab | 0.12 | 1.02 b  | 0.28 | 0.77 a  | 0.51 | 0.02 a  | 0.02 | 0.01 a  | 0.01 | 3.20 b  | 0.53 |
| 2006 | AB  | SF | 4.10 b  | 0.12 | 0.58 a  | 0.24 | 0.46 a  | 0.09 | 0.02 a  | 0.00 | 0.00 a  | 0.00 | 1.31 a  | 0.27 |

| Y    | D   | T  | pH      |      | SOM     |      | Ca      |      | Mg      |      | K       |      | Al      |      |
|------|-----|----|---------|------|---------|------|---------|------|---------|------|---------|------|---------|------|
|      |     |    | Mean    | SD   |
| 2007 | Ap1 | C  | 3.92 a  | 0.06 | 2.22 ab | 0.31 | 0.27 a  | 0.17 | 0.08 ab | 0.03 | 0.08 b  | 0.03 | 2.90 b  | 1.31 |
| 2007 | Ap1 | G  | 3.92 a  | 0.06 | 2.47 b  | 0.32 | 0.90 a  | 0.69 | 0.07 ab | 0.03 | 0.06 ab | 0.02 | 1.51 a  | 0.42 |
| 2007 | Ap1 | L  | 4.67 b  | 0.27 | 2.58 b  | 0.32 | 2.60 b  | 1.00 | 0.04 a  | 0.03 | 0.05 a  | 0.01 | 0.57 a  | 0.29 |
| 2007 | Ap1 | SF | 6.39 c  | 0.33 | 1.98 a  | 0.14 | 3.87 c  | 0.92 | 0.10 b  | 0.02 | 0.05 a  | 0.02 | 0.67 a  | 0.32 |
| 2007 | Ap2 | C  | 3.98 a  | 0.05 | 1.92 a  | 0.46 | 0.18 a  | 0.17 | 0.09 b  | 0.02 | 0.06 a  | 0.02 | 3.06 b  | 1.24 |
| 2007 | Ap2 | G  | 3.95 a  | 0.16 | 2.17 a  | 0.19 | 0.45 ab | 0.35 | 0.09 b  | 0.02 | 0.06 a  | 0.01 | 2.06 ab | 0.75 |
| 2007 | Ap2 | L  | 4.30 b  | 0.17 | 2.18 a  | 0.31 | 1.57 bc | 0.45 | 0.03 a  | 0.03 | 0.03 a  | 0.02 | 1.04 a  | 0.42 |
| 2007 | Ap2 | SF | 5.17 c  | 0.28 | 2.19 a  | 0.35 | 2.23 c  | 1.30 | 0.08 b  | 0.04 | 0.04 a  | 0.03 | 1.41 a  | 0.33 |
| 2007 | AB  | C  | 4.05 a  | 0.06 | 0.58 a  | 0.18 | 0.13 a  | 0.09 | 0.08 a  | 0.03 | 0.06 c  | 0.02 | 2.92 a  | 1.24 |
| 2007 | AB  | G  | 4.04 a  | 0.18 | 0.75 a  | 0.16 | 0.25 a  | 0.12 | 0.09 a  | 0.03 | 0.05 bc | 0.01 | 2.27 a  | 0.89 |
| 2007 | AB  | L  | 4.00 a  | 0.05 | 0.66 a  | 0.12 | 0.46 a  | 0.06 | 0.07 a  | 0.01 | 0.02 a  | 0.01 | 2.17 a  | 0.54 |
| 2007 | AB  | SF | 4.15 a  | 0.12 | 0.68 a  | 0.21 | 0.46 a  | 0.53 | 0.08 a  | 0.04 | 0.03 ab | 0.02 | 3.45 a  | 1.43 |
| 2008 | Ap1 | C  | 4.07 a  | 0.11 | 2.12 a  | 0.15 | 0.09 a  | 0.08 | 0.05 b  | 0.01 | 0.09 a  | 0.04 | 2.10 b  | 0.92 |
| 2008 | Ap1 | G  | 4.19 a  | 0.04 | 2.31 a  | 0.31 | 1.22 a  | 0.57 | 0.03 ab | 0.00 | 0.09 a  | 0.08 | 1.23 ab | 0.35 |
| 2008 | Ap1 | L  | 5.48 b  | 0.36 | 2.29 a  | 0.13 | 3.65 b  | 0.63 | 0.09 c  | 0.02 | 0.07 a  | 0.06 | 0.82 a  | 0.61 |
| 2008 | Ap1 | SF | 5.67 b  | 0.27 | 2.20 a  | 0.17 | 4.14 b  | 1.65 | 0.03 a  | 0.00 | 0.02 a  | 0.01 | 0.56 a  | 0.24 |
| 2008 | Ap2 | C  | 4.11 a  | 0.04 | 2.07 a  | 0.48 | 0.10 a  | 0.08 | 0.04 a  | 0.01 | 0.09 b  | 0.03 | 1.49 ab | 0.34 |
| 2008 | Ap2 | G  | 4.23 a  | 0.15 | 2.31 a  | 0.51 | 0.91 b  | 0.43 | 0.03 a  | 0.02 | 0.08 b  | 0.06 | 1.63 b  | 0.79 |
| 2008 | Ap2 | L  | 4.72 b  | 0.25 | 2.31 a  | 0.29 | 2.33 c  | 0.16 | 0.04 a  | 0.02 | 0.05 ab | 0.03 | 0.59 a  | 0.25 |
| 2008 | Ap2 | SF | 5.16 b  | 0.49 | 2.28 a  | 0.36 | 2.16 c  | 0.15 | 0.04 a  | 0.00 | 0.02 a  | 0.01 | 1.19 ab | 0.79 |
| 2008 | AB  | C  | 4.16 a  | 0.15 | 0.89 a  | 0.14 | 0.16 a  | 0.07 | 0.04 a  | 0.02 | 0.06 c  | 0.01 | 2.16 a  | 0.85 |
| 2008 | AB  | G  | 4.24 a  | 0.08 | 1.34 ab | 0.75 | 0.54 a  | 0.11 | 0.03 a  | 0.03 | 0.04 bc | 0.02 | 1.34 a  | 1.04 |
| 2008 | AB  | L  | 4.42 ab | 0.23 | 1.67 b  | 0.14 | 1.52 b  | 0.78 | 0.03 a  | 0.02 | 0.03 ab | 0.03 | 1.41 a  | 0.89 |
| 2008 | AB  | SF | 4.66 b  | 0.43 | 1.34 ab | 0.36 | 1.54 b  | 0.36 | 0.03 a  | 0.03 | 0.01 a  | 0.00 | 1.88 a  | 1.00 |
| 2009 | Ap1 | C  | 3.98 a  | 0.33 | 1.54 a  | 0.41 | 0.16 a  | 0.12 | 0.05 ab | 0.02 | 0.10 a  | 0.03 | 2.72 b  | 0.16 |
| 2009 | Ap1 | G  | 3.91 a  | 0.07 | 2.08 b  | 0.26 | 1.10 b  | 0.18 | 0.04 ab | 0.02 | 0.09 a  | 0.08 | 2.63 b  | 0.72 |
| 2009 | Ap1 | L  | 4.53 b  | 0.04 | 2.03 b  | 0.14 | 1.98 c  | 0.14 | 0.07 b  | 0.03 | 0.04 a  | 0.00 | 1.44 a  | 0.28 |
| 2009 | Ap1 | SF | 5.60 c  | 0.15 | 1.57 a  | 0.11 | 4.33 d  | 0.69 | 0.03 a  | 0.01 | 0.04 a  | 0.00 | 0.80 a  | 0.27 |
| 2009 | Ap2 | C  | 3.94 a  | 0.09 | 1.57 a  | 0.11 | 0.22 a  | 0.16 | 0.04 a  | 0.02 | 0.07 ab | 0.02 | 2.05 b  | 0.20 |
| 2009 | Ap2 | G  | 3.95 a  | 0.03 | 1.83 a  | 0.34 | 0.66 a  | 0.47 | 0.04 a  | 0.03 | 0.09 b  | 0.08 | 2.07 b  | 0.55 |
| 2009 | Ap2 | L  | 4.15 a  | 0.17 | 1.76 a  | 0.18 | 1.12 a  | 0.61 | 0.05 a  | 0.03 | 0.02 ab | 0.01 | 1.68 b  | 1.26 |
| 2009 | Ap2 | SF | 4.85 b  | 0.56 | 1.56 a  | 0.29 | 2.91 b  | 1.46 | 0.03 a  | 0.00 | 0.02 a  | 0.01 | 0.42 a  | 0.25 |
| 2009 | AB  | C  | 4.05 a  | 0.02 | 0.67 ab | 0.20 | 0.23 a  | 0.17 | 0.04 ab | 0.02 | 0.02 a  | 0.02 | 2.54 ab | 1.03 |
| 2009 | AB  | G  | 4.06 a  | 0.14 | 0.73 b  | 0.12 | 0.63 ab | 0.38 | 0.04 ab | 0.01 | 0.04 a  | 0.04 | 4.06 b  | 1.35 |
| 2009 | AB  | L  | 4.04 a  | 0.06 | 0.68 ab | 0.11 | 0.39 a  | 0.15 | 0.04 b  | 0.01 | 0.01 a  | 0.01 | 2.19 a  | 0.50 |
| 2009 | AB  | SF | 4.06 a  | 0.01 | 0.46 a  | 0.11 | 0.99 b  | 0.38 | 0.02 a  | 0.01 | 0.02 a  | 0.01 | 2.73 ab | 1.54 |
| 2010 | Ap1 | C  | 3.83 a  | 0.09 | 2.03 a  | 0.41 | 0.14 a  | 0.06 | 0.05 a  | 0.04 | 0.12 b  | 0.03 | 2.31 c  | 0.52 |
| 2010 | Ap1 | G  | 3.98 a  | 0.04 | 2.11 a  | 0.29 | 1.48 b  | 0.28 | 0.06 a  | 0.00 | 0.12 b  | 0.01 | 1.19 b  | 0.33 |
| 2010 | Ap1 | L  | 4.81 b  | 0.36 | 1.90 a  | 0.03 | 2.87 c  | 0.88 | 0.03 a  | 0.02 | 0.10 ab | 0.04 | 0.25 a  | 0.01 |
| 2010 | Ap1 | SF | 5.64 c  | 0.16 | 2.05 a  | 0.11 | 4.75 d  | 1.04 | 0.05 a  | 0.01 | 0.07 a  | 0.01 | 0.23 a  | 0.13 |

| Y    | D   | T  | pH      |      | SOM     |      | Ca      |      | Mg      |      | K       |      | Al      |      |
|------|-----|----|---------|------|---------|------|---------|------|---------|------|---------|------|---------|------|
|      |     |    | Mean    | SD   |
| 2010 | Ap2 | C  | 4.12 ab | 0.38 | 1.77 a  | 0.31 | 0.11 a  | 0.06 | 0.06 a  | 0.03 | 0.11 b  | 0.02 | 1.62 c  | 0.56 |
| 2010 | Ap2 | G  | 4.04 a  | 0.18 | 1.98 a  | 0.64 | 1.32 b  | 0.08 | 0.05 a  | 0.02 | 0.10 b  | 0.02 | 1.24 bc | 0.33 |
| 2010 | Ap2 | L  | 4.42 ab | 0.31 | 1.76 a  | 0.09 | 1.96 bc | 0.85 | 0.06 a  | 0.03 | 0.09 b  | 0.03 | 0.68 ab | 0.52 |
| 2010 | Ap2 | SF | 4.69 b  | 0.55 | 1.81 a  | 0.11 | 2.48 c  | 0.68 | 0.05 a  | 0.01 | 0.05 a  | 0.01 | 0.21 a  | 0.14 |
| 2010 | AB  | C  | 4.31 a  | 0.35 | 0.70 a  | 0.13 | 0.12 a  | 0.10 | 0.06 a  | 0.01 | 0.09 b  | 0.03 | 2.62 a  | 0.98 |
| 2010 | AB  | G  | 4.15 a  | 0.09 | 0.78 a  | 0.33 | 0.89 b  | 0.50 | 0.06 a  | 0.01 | 0.07 ab | 0.00 | 1.50 a  | 0.44 |
| 2010 | AB  | L  | 4.04 a  | 0.12 | 0.63 a  | 0.16 | 0.91 b  | 0.42 | 0.05 a  | 0.04 | 0.08 b  | 0.01 | 2.32 a  | 1.37 |
| 2010 | AB  | SF | 4.11 a  | 0.10 | 0.68 a  | 0.04 | 0.91 b  | 0.17 | 0.06 a  | 0.04 | 0.05 a  | 0.00 | 1.32 a  | 0.22 |
| 2011 | Ap1 | C  | 3.99 a  | 0.08 | 2.02 a  | 0.10 | 0.23 a  | 0.03 | 0.15 a  | 0.02 | 0.25 a  | 0.09 | 1.84 bc | 0.52 |
| 2011 | Ap1 | G  | 3.99 a  | 0.07 | 2.16 a  | 0.18 | 1.18 b  | 0.47 | 0.17 a  | 0.02 | 0.33 a  | 0.09 | 2.11 c  | 0.90 |
| 2011 | Ap1 | L  | 4.77 b  | 0.13 | 2.12 a  | 0.10 | 4.00 c  | 0.63 | 0.26 b  | 0.02 | 0.43 a  | 0.28 | 1.07 ab | 0.41 |
| 2011 | Ap1 | SF | 5.10 c  | 0.13 | 2.10 a  | 0.31 | 4.12 c  | 0.53 | 0.18 a  | 0.01 | 0.22 a  | 0.15 | 0.47 a  | 0.27 |
| 2011 | Ap2 | C  | 4.06 ab | 0.11 | 1.51 a  | 0.53 | 0.09 a  | 0.04 | 0.14 a  | 0.01 | 0.24 a  | 0.09 | 2.52 c  | 0.36 |
| 2011 | Ap2 | G  | 3.904 a | 0.05 | 2.20 b  | 0.56 | 1.01 b  | 0.58 | 0.17 b  | 0.01 | 0.26 a  | 0.09 | 1.61 b  | 0.43 |
| 2011 | Ap2 | L  | 4.38 b  | 0.12 | 2.14 ab | 0.20 | 2.36 c  | 0.30 | 0.21 c  | 0.02 | 0.33 a  | 0.18 | 1.32 b  | 0.58 |
| 2011 | Ap2 | SF | 4.99 c  | 0.45 | 1.88 ab | 0.14 | 3.73 d  | 0.42 | 0.17 b  | 0.00 | 0.15 a  | 0.07 | 0.55 a  | 0.20 |
| 2011 | AB  | C  | 4.14 a  | 0.04 | 0.90 a  | 0.17 | 0.09 a  | 0.04 | 0.14 a  | 0.01 | 0.24 a  | 0.10 | 2.16 b  | 0.32 |
| 2011 | AB  | G  | 4.10 a  | 0.16 | 1.21 a  | 0.26 | 0.55 a  | 0.42 | 0.15 ab | 0.02 | 0.21 a  | 0.12 | 1.87 b  | 0.71 |
| 2011 | AB  | L  | 4.11 a  | 0.04 | 1.11 a  | 0.44 | 1.13 b  | 0.39 | 0.17 c  | 0.00 | 0.33 a  | 0.18 | 2.06 b  | 1.04 |
| 2011 | AB  | SF | 4.29 a  | 0.28 | 1.05 a  | 0.12 | 1.65 b  | 0.41 | 0.16 bc | 0.00 | 0.14 a  | 0.05 | 0.55 a  | 0.48 |

**Table S2.** Means and standard deviations (SD) of biomass (Biomass: total rye biomass; Spike: spike rye biomass; Stem: stem rye biomass (all of them in kg/ha)) during ten years (2002–2011). Values within each column followed by different lowercase letters are significantly different according to Tukey's honest significance test with Holm-Bonferroni adjustment (0.05). Y: Year of sampling; T: Liming treatment (C: control; G: gypsum; L: limestone; SF: sugar foam).

| Y    | T  | Biomass |     | Spike   |      | Stem    |      |
|------|----|---------|-----|---------|------|---------|------|
|      |    | Mean    | SD  | Mean    | SD   | Mean    | SD   |
| 2002 | C  | 2740 a  | 116 | 1190 a  | 79.3 | 1550 a  | 41.7 |
| 2002 | G  | 3730 b  | 334 | 1610 b  | 106  | 2110 ab | 234  |
| 2002 | L  | 4770 c  | 467 | 2030 c  | 148  | 2740 bc | 322  |
| 2002 | SF | 5640 d  | 712 | 2480 d  | 88.4 | 3160 c  | 709  |
| 2003 | C  | 2100 a  | 228 | 836 a   | 62.4 | 1270 a  | 166  |
| 2003 | G  | 2380 b  | 144 | 1000 b  | 82.4 | 1380 a  | 68.9 |
| 2003 | L  | 3440 c  | 117 | 1340 c  | 73.0 | 2100 b  | 76.0 |
| 2003 | SF | 3490 c  | 111 | 1430 c  | 31.4 | 2060 b  | 124  |
| 2004 | C  | 1210 a  | 177 | 515 a   | 142  | 693 a   | 42.8 |
| 2004 | G  | 1700 ab | 152 | 717 ab  | 87.2 | 979 ab  | 78.6 |
| 2004 | L  | 2360 bc | 404 | 1000 bc | 193  | 1350 b  | 217  |
| 2004 | SF | 2500 c  | 860 | 1110 c  | 346  | 1390 b  | 520  |

| Y    | T  | Biomass |      | Spike   |      | Stem    |      |
|------|----|---------|------|---------|------|---------|------|
|      |    | Mean    | SD   | Mean    | SD   | Mean    | SD   |
| 2005 | C  | 1580 a  | 185  | 578 a   | 27.9 | 997 a   | 159  |
| 2005 | G  | 2090 b  | 272  | 796 b   | 134  | 1290 b  | 142  |
| 2005 | L  | 2920 c  | 116  | 1210 c  | 36.4 | 1720 c  | 104  |
| 2005 | SF | 3320 d  | 158  | 1310 c  | 94.4 | 2010 d  | 120  |
| 2006 | C  | 2850 a  | 340  | 1350 a  | 294  | 1500 a  | 58.6 |
| 2006 | G  | 3400 a  | 501  | 1590 a  | 235  | 1810 a  | 271  |
| 2006 | L  | 4300 b  | 240  | 1990 b  | 85.1 | 2320 b  | 171  |
| 2006 | SF | 4130 b  | 413  | 1930 b  | 81.8 | 2200 b  | 337  |
| 2007 | C  | 173.4 a | 74.7 | 80.0 a  | 35.5 | 93.4 a  | 39.3 |
| 2007 | G  | 208 a   | 44.4 | 101 a   | 23.5 | 107 a   | 30.9 |
| 2007 | L  | 1090 b  | 187  | 452 b   | 116  | 633 c   | 77.5 |
| 2007 | SF | 1000 b  | 239  | 551 b   | 157  | 451 b   | 89.0 |
| 2008 | C  | 2430 a  | 365  | 968 a   | 151  | 1470 a  | 220  |
| 2008 | G  | 2500 a  | 694  | 907 a   | 427  | 1590 a  | 278  |
| 2008 | L  | 2910 a  | 681  | 1220 a  | 280  | 1690 a  | 403  |
| 2008 | SF | 2190 a  | 464  | 888 a   | 165  | 1300 a  | 299  |
| 2009 | C  | 1760 a  | 45.5 | 842 a   | 42.7 | 915 a   | 57.1 |
| 2009 | G  | 2040 a  | 365  | 952 a   | 168  | 1090 a  | 200  |
| 2009 | L  | 2830 b  | 433  | 1410 b  | 208  | 1430 b  | 233  |
| 2009 | SF | 3360 c  | 327  | 1580 b  | 282  | 1780 c  | 49.1 |
| 2010 | C  | 3030 a  | 72.7 | 1300 a  | 20.9 | 1720 a  | 58.2 |
| 2010 | G  | 3240 ab | 309  | 1400 ab | 120  | 1840 ab | 199  |
| 2010 | L  | 3550 b  | 317  | 1610 c  | 188  | 1950 ab | 138  |
| 2010 | SF | 3590 b  | 315  | 1580 bc | 90.7 | 2010 b  | 227  |
| 2011 | C  | 2440 a  | 279  | 1070 a  | 106  | 1360 a  | 173  |
| 2011 | G  | 2820 ab | 279  | 1220 ab | 125  | 1600 ab | 153  |
| 2011 | L  | 3210 bc | 400  | 1430 b  | 140  | 1780 bc | 267  |
| 2011 | SF | 3350 c  | 299  | 1420 b  | 231  | 1940 c  | 143  |

**Table S3.** Means and standard deviations (SD) of calcium, magnesium and potassium content in rye biomass (Ca-Rye, Mg-Rye and K-Rye respectively; all of them in %) during ten years (2002–2011). Values within each column followed by different lowercase letters are significantly different according to Tukey's honest significance test with Holm-Bonferroni adjustment (0.05). Y: Year of sampling; T: Liming treatment (C: control; G: gypsum; L: limestone; SF: sugar foam).

| Y    | T  | Ca-Rye |      | Mg-Rye |      | K-Rye   |      |
|------|----|--------|------|--------|------|---------|------|
|      |    | Mean   | SD   | Mean   | SD   | Mean    | SD   |
| 2002 | C  | 0.10 a | 0.04 | 0.04 a | 0.01 | 0.73 b  | 0.09 |
| 2002 | G  | 0.21 a | 0.13 | 0.04 a | 0.00 | 0.74 b  | 0.19 |
| 2002 | L  | 0.15 a | 0.04 | 0.05 b | 0.01 | 0.59 ab | 0.15 |
| 2002 | SF | 0.18 a | 0.04 | 0.09 c | 0.01 | 0.38 a  | 0.11 |

| Y    | T  | Ca-Rye  |      | Mg-Rye  |      | K-Rye   |      |
|------|----|---------|------|---------|------|---------|------|
|      |    | Mean    | SD   | Mean    | SD   | Mean    | SD   |
| 2003 | C  | 0.17 a  | 0.02 | 0.03 b  | 0.01 | 0.29 a  | 0.05 |
| 2003 | G  | 0.26 b  | 0.03 | 0.02 a  | 0.01 | 0.38 b  | 0.08 |
| 2003 | L  | 0.20 ab | 0.03 | 0.04 c  | 0.00 | 0.37 b  | 0.02 |
| 2003 | SF | 0.18 a  | 0.06 | 0.05 c  | 0.01 | 0.38 b  | 0.04 |
| 2004 | C  | 0.13 a  | 0.03 | 0.02 ab | 0.01 | 0.54 ab | 0.03 |
| 2004 | G  | 0.21 b  | 0.02 | 0.02 a  | 0.00 | 0.62 b  | 0.12 |
| 2004 | L  | 0.22 b  | 0.04 | 0.03 b  | 0.00 | 0.47 a  | 0.08 |
| 2004 | SF | 0.19 ab | 0.06 | 0.04 c  | 0.00 | 0.41 a  | 0.08 |
| 2005 | C  | 0.14 a  | 0.06 | 0.03 ab | 0.00 | 0.79 b  | 0.21 |
| 2005 | G  | 0.18 a  | 0.09 | 0.03 ab | 0.00 | 0.76 b  | 0.05 |
| 2005 | L  | 0.22 a  | 0.03 | 0.03 a  | 0.01 | 0.73 ab | 0.08 |
| 2005 | SF | 0.24 a  | 0.06 | 0.04 b  | 0.01 | 0.52 a  | 0.17 |
| 2006 | C  | 0.08 a  | 0.01 | 0.02 a  | 0.01 | 0.46 bc | 0.01 |
| 2006 | G  | 0.10 a  | 0.01 | 0.03 a  | 0.01 | 0.52 c  | 0.02 |
| 2006 | L  | 0.14 b  | 0.04 | 0.03 a  | 0.00 | 0.45 ab | 0.04 |
| 2006 | SF | 0.16 b  | 0.01 | 0.03 a  | 0.01 | 0.40 a  | 0.05 |
| 2007 | C  | 0.07 a  | 0.01 | 0.02 a  | 0.01 | 0.48 ab | 0.08 |
| 2007 | G  | 0.20 b  | 0.08 | 0.03 ab | 0.00 | 0.52 ab | 0.04 |
| 2007 | L  | 0.25 b  | 0.11 | 0.04 b  | 0.00 | 0.58 b  | 0.13 |
| 2007 | SF | 0.15 ab | 0.08 | 0.04 b  | 0.01 | 0.43 a  | 0.07 |
| 2008 | C  | 0.12 a  | 0.02 | 0.02 a  | 0.00 | 0.65 a  | 0.04 |
| 2008 | G  | 0.13 a  | 0.02 | 0.03 a  | 0.01 | 0.57 a  | 0.13 |
| 2008 | L  | 0.20 b  | 0.01 | 0.04 b  | 0.01 | 0.67 a  | 0.04 |
| 2008 | SF | 0.26 c  | 0.06 | 0.04 b  | 0.00 | 0.64 a  | 0.09 |
| 2009 | C  | 0.10 a  | 0.01 | 0.02 a  | 0.01 | 0.46 b  | 0.05 |
| 2009 | G  | 0.18 b  | 0.03 | 0.02 a  | 0.00 | 0.47 b  | 0.06 |
| 2009 | L  | 0.20 b  | 0.02 | 0.04 b  | 0.01 | 0.35 a  | 0.03 |
| 2009 | SF | 0.21 b  | 0.05 | 0.03 b  | 0.00 | 0.33 a  | 0.03 |
| 2010 | C  | 0.12 a  | 0.00 | 0.02 a  | 0.01 | 0.45 a  | 0.07 |
| 2010 | G  | 0.21 b  | 0.02 | 0.02 a  | 0.00 | 0.38 a  | 0.14 |
| 2010 | L  | 0.24 c  | 0.03 | 0.05 b  | 0.02 | 0.45 a  | 0.08 |
| 2010 | SF | 0.27 c  | 0.01 | 0.03 ab | 0.02 | 0.52 a  | 0.07 |
| 2011 | C  | 0.11 a  | 0.04 | 0.02 a  | 0.01 | 0.44 b  | 0.07 |
| 2011 | G  | 0.11 a  | 0.08 | 0.01 a  | 0.00 | 0.37 ab | 0.05 |
| 2011 | L  | 0.08 a  | 0.02 | 0.04 b  | 0.00 | 0.39 b  | 0.13 |
| 2011 | SF | 0.16 a  | 0.07 | 0.04 b  | 0.01 | 0.24 a  | 0.05 |
